# Supplementary material for: From gut to skin: exploring the potential of natural products targeting microorganisms for atopic dermatitis treatment
Source: Royal Society of Chemistry journal article supplement (doi:10.1039/d3fo02455e), 2023-01-01
Supplement: d3fo02455e1.pdf [file d3fo02455e1.pdf]

**Supplementary table1.** Quality appraisal of studies included in the review.

| Study               | Randomization | Concealment of allocation | of Double blinding | Withdrawls and dropouts | Total score |
|---------------------|---------------|---------------------------|--------------------|-------------------------|-------------|
| Ahn SH 2020         | 1             | 2                         | 2                  | 1                       | 6           |
| Carucci L 2022      | 2             | 2                         | 2                  | 1                       | 7           |
| D'Auria E 2021      | 1             | 2                         | 1                  | 1                       | 5           |
| Drago L 2011        | 2             | 2                         | 1                  | 1                       | 6           |
| Foekel C 2009       | 1             | 2                         | 2                  | 0                       | 5           |
| Lopes C 2015        | 2             | 2                         | 2                  | 1                       | 7           |
| Matsumoto M 2007    | 1             | 2                         | 2                  | 1                       | 6           |
| Ranucci G 2018      | 2             | 2                         | 2                  | 1                       | 7           |
| Rozé JC 2012        | 2             | 2                         | 2                  | 1                       | 7           |
| Schempp CM 2003     | 2             | 2                         | 2                  | 1                       | 7           |
| Udompataikul M 2015 | 1             | 2                         | 1                  | 1                       | 5           |
| Weiss A 2022        | 2             | 2                         | 2                  | 1                       | 7           |

Note:

We used Modified Jadad scale to assess the included studies. Points were determined as follows,

- I. Randomization: the method of randomization was described, and it was appropriate, 2 points; the study was described as randomized, 1 point; not randomized or inappropriate method of randomization, 0 point.
- II. Concealment of allocation: the method of allocation concealment was described appropriate, 2 points; the study was described as using allocation concealment method, 1 point; not describe the method of allocation concealment, 0 point.

III. Blindness: identical placebo tablets or similar, 2 points; inadequate or not described, 1 point; inappropriate or no double blinding, 0 point.

IV. Withdrawals and drop-outs: numbers and reasons are described, 1 point; not described, 0 point.

The Modified Jadad score ranges from 1 to 7; higher score indicates better RCT quality. If a study had a modified Jadad score  $>4$  points, it was of high quality; if the score was 3-4 points, it was moderate quality; and if the score was  $<3$  points, it was low quality.
